# Supplementary material for: Ketamine/xylazine and barbiturates modulate microglial morphology and motility differently in a mouse model
Source: PubMed Central journal article supplement (PMC7410236; doi:10.1371/journal.pone.0236594), 2020-08-06
Supplement: pone.0236594.s002.pdf [file pone.0236594.s002.pdf]

| Fig 2C                    | Microglial complexity     |                    |
|---------------------------|---------------------------|--------------------|
|                           | Pre-ket/xyl               | Post-ket/xyl       |
| Values                    | 1.589813563               | 1.535612357        |
|                           | 1.598335304               | 1.584283553        |
|                           | 1.539948937               | 1.560683102        |
|                           | 1.516786632               | 1.490205717        |
|                           | 1.57431312                | 1.538736543        |
|                           | 1.556073862               | 1.503621982        |
|                           | 1.604381649               | 1.601622396        |
|                           | 1.502075107               | 1.495271854        |
|                           | 1.445230362               | 1.434893783        |
|                           | 1.594030138               | 1.533133872        |
|                           | 1.579194713               | 1.546303997        |
|                           | 1.568386249               | 1.520518006        |
|                           | 1.477742716               | 1.511342142        |
|                           | 1.502107789               | 1.492477183        |
|                           | 1.481255801               | 1.447081837        |
|                           | 1.57948573                | 1.53434315         |
|                           | 1.550472439               | 1.498137048        |
|                           | 1.553221984               | 1.524583994        |
| <b>Mean</b>               | <b>1.545158672</b>        | <b>1.519602918</b> |
| <b>SEM</b>                | <b>0.011123085</b>        | <b>0.009869768</b> |
| <b>Statistical method</b> | Paired t-test, two tailed |                    |
| <b>p-value</b>            | ***p<0.001                |                    |
| <b># cells</b>            | 18                        | 18                 |

| Fig 2D                    | Microglial motility       |                    |
|---------------------------|---------------------------|--------------------|
|                           | Pre-ket/xyl               | Post-ket/xyl       |
| Values                    | 741.1652524               | 633.6537545        |
|                           | 874.3865943               | 798.2409871        |
|                           | 960.3261924               | 984.7037826        |
|                           | 764.9635285               | 572.0439496        |
|                           | 893.5543853               | 706.0208525        |
|                           | 733.3180186               | 601.7652104        |
|                           | 814.271851                | 675.2949477        |
|                           | 933.2632106               | 852.8060132        |
|                           | 612.4491291               | 571.1101922        |
|                           | 1046.914288               | 646.6579845        |
|                           | 958.4653837               | 823.4860105        |
|                           | 758.0204792               | 655.6078447        |
|                           | 638.6186698               | 609.5658157        |
|                           | 719.7512485               | 614.9074623        |
|                           | 909.1818296               | 709.9264306        |
|                           | 1108.854035               | 954.0874585        |
|                           | 1074.250903               | 750.2197091        |
|                           | 951.3645108               | 706.5891           |
| <b>Mean</b>               | <b>860.7288617</b>        | <b>714.8159725</b> |
| <b>SEM</b>                | <b>34.39918115</b>        | <b>29.19523509</b> |
| <b>Statistical method</b> | Paired t-test, two tailed |                    |
| <b>p-value</b>            | ****p<0.0001              |                    |
| <b># cells</b>            | 18                        | 18                 |

| Fig 2E                    | Microglial complexity     |                    |
|---------------------------|---------------------------|--------------------|
|                           | Pre-pento                 | Post-pento         |
| Values                    | 1.479133065               | 1.48639672         |
|                           | 1.546229554               | 1.539486458        |
|                           | 1.54573941                | 1.557500897        |
|                           | 1.603696273               | 1.580118169        |
|                           | 1.558112188               | 1.526161703        |
|                           | 1.627189589               | 1.626023184        |
|                           | 1.56064275                | 1.555195613        |
|                           | 1.565231482               | 1.586279565        |
|                           | 1.542170597               | 1.594389887        |
|                           | 1.572623602               | 1.559559698        |
|                           | 1.561611859               | 1.575038664        |
|                           | 1.571754227               | 1.563928153        |
|                           | 1.556566274               | 1.578045862        |
|                           | 1.580052777               | 1.606503394        |
|                           | 1.556303117               | 1.54765312         |
|                           | 1.591221344               | 1.591554174        |
|                           | 1.539678727               | 1.528475888        |
|                           | 1.613333483               | 1.628736904        |
| <b>Mean</b>               | <b>1.565071684</b>        | <b>1.568391559</b> |
| <b>SEM</b>                | <b>0.007717446</b>        | <b>0.00848031</b>  |
| <b>Statistical method</b> | Paired t-test, two tailed |                    |
| <b>p-value</b>            | p>0.05                    |                    |
| <b># cells</b>            | 18                        | 18                 |

| Fig 2F                    | Microglial motility       |                    |
|---------------------------|---------------------------|--------------------|
|                           | Pre-pento                 | Post-pento         |
| Values                    | 701.1620645               | 681.4787444        |
|                           | 857.7296314               | 720.3899371        |
|                           | 816.4977289               | 688.5277835        |
|                           | 1010.027849               | 880.8181989        |
|                           | 746.1730688               | 601.5994777        |
|                           | 1021.288604               | 873.2763583        |
|                           | 760.4657055               | 647.9059597        |
|                           | 869.3778987               | 809.1606861        |
|                           | 637.9018478               | 681.7006905        |
|                           | 1185.767106               | 960.3784895        |
|                           | 887.3529871               | 827.5206656        |
|                           | 708.9661404               | 617.1317003        |
|                           | 833.8512766               | 799.0240303        |
|                           | 923.6451938               | 873.2442586        |
|                           | 808.6262107               | 751.7762988        |
|                           | 944.8154434               | 957.3760493        |
|                           | 714.1810186               | 596.6062315        |
|                           | 805.5660382               | 743.6784492        |
| <b>Mean</b>               | <b>846.2997674</b>        | <b>761.7552227</b> |
| <b>SEM</b>                | <b>32.00374675</b>        | <b>27.54474249</b> |
| <b>Statistical method</b> | Paired t-test, two tailed |                    |
| <b>p-value</b>            | ****p<0.0001              |                    |
| <b># cells</b>            | 18                        | 18                 |

| Fig 3D             | Microglial cytoplasm                       |                    |                    |
|--------------------|--------------------------------------------|--------------------|--------------------|
|                    | Control                                    | Ket/xyl            | Thiopental         |
| Values             | 59.2                                       | 48.24              | 50.4               |
|                    | 52.64                                      | 61.84              | 51.84              |
|                    | 54.6                                       | 58.86              | 49.52              |
|                    | 50.32                                      | 55.48              | 53.56              |
|                    | 54.36                                      | 51.32              | 57.12              |
|                    |                                            | 58.44              | 58.4               |
| Mean               | <b>54.224</b>                              | <b>55.69666667</b> | <b>53.47333333</b> |
| SD                 | <b>3.266141454</b>                         | <b>5.100531998</b> | <b>3.6144082</b>   |
| Statistical method | Kruskall Wallis test and Dunn's correction |                    |                    |
| p-value            |                                            | p>0.05             | p>0.05             |
| # cells            | 1975                                       | 2662               | 2495               |

| Fig 3E             | Microglial complexity                      |                    |                   |
|--------------------|--------------------------------------------|--------------------|-------------------|
|                    | Control                                    | Ket/xyl            | Thiopental        |
| Values             | 3.211                                      | 3.001              | 3.411             |
|                    | 3.501                                      | 3.265              | 3.409             |
|                    | 3.548                                      | 3.264              | 3.489             |
|                    | 3.564                                      | 3.257              | 3.132             |
|                    | 3.409                                      | 3.059              | 3.527             |
|                    |                                            | 3.279              | 3.408             |
| Mean               | <b>3.4466</b>                              | <b>3.1875</b>      | <b>3.396</b>      |
| SD                 | <b>0.14486649</b>                          | <b>0.123576292</b> | <b>0.13859582</b> |
| Statistical method | Kruskall Wallis test and Dunn's correction |                    |                   |
| p-value            |                                            | p<0.05             | p>0.05            |
| # cells            | 1975                                       | 2662               | 2495              |

| Fig 3F             | Microglial cell environment                |                    |                   |
|--------------------|--------------------------------------------|--------------------|-------------------|
|                    | Control                                    | Ket/xyl            | Thiopental        |
| Values             | 198.4                                      | 134.8              | 213.4             |
|                    | 259.3                                      | 169                | 230.3             |
|                    | 245.9                                      | 189.4              | 208.4             |
|                    | 141                                        | 154.1              | 163.8             |
|                    | 169.6                                      | 141.9              | 220.3             |
|                    |                                            | 209                | 217.9             |
| Mean               | <b>202.84</b>                              | <b>166.3666667</b> | <b>209.016667</b> |
| SD                 | <b>49.97672458</b>                         | <b>28.6377839</b>  | <b>23.338159</b>  |
| Statistical method | Kruskall Wallis test and Dunn's correction |                    |                   |
| p-value            |                                            | p>0.05             | p>0.05            |
| # cells            | 1975                                       | 2662               | 2495              |

| Fig 3G             | Segments by cell                           |                    |                   |
|--------------------|--------------------------------------------|--------------------|-------------------|
|                    | Control                                    | Ket/xyl            | Thiopental        |
| Values             | 10.93                                      | 9.246              | 10.97             |
|                    | 12.17                                      | 10.11              | 11.36             |
|                    | 11.78                                      | 10.47              | 11.31             |
|                    | 10.41                                      | 9.817              | 10.03             |
|                    | 10.99                                      | 9.666              | 11.89             |
|                    |                                            | 11.34              | 11.77             |
| Mean               | <b>11.256</b>                              | <b>10.10816667</b> | <b>11.2216667</b> |
| SD                 | <b>0.70758745</b>                          | <b>0.731021318</b> | <b>0.67196478</b> |
| Statistical method | Kruskall Wallis test and Dunn's correction |                    |                   |
| p-value            |                                            | p>0.05             | p>0.05            |
| # cells            | 1975                                       | 2662               | 2495              |

| Fig 3H             | Microglial ramification length             |                    |                   |
|--------------------|--------------------------------------------|--------------------|-------------------|
|                    | Control                                    | Ket/xyl            | Thiopental        |
| Values             | 336.3                                      | 287.6              | 345               |
|                    | 380.9                                      | 310.9              | 358.3             |
|                    | 369.4                                      | 328.8              | 354.1             |
|                    | 316.2                                      | 298.8              | 309.8             |
|                    | 342.3                                      | 292.4              | 361.8             |
|                    |                                            | 318                | 366.6             |
| Mean               | <b>349.02</b>                              | <b>306.0833333</b> | <b>349.266667</b> |
| SD                 | <b>26.05661145</b>                         | <b>15.89445396</b> | <b>20.6800064</b> |
| Statistical method | Kruskall Wallis test and Dunn's correction |                    |                   |
| p-value            |                                            | p<0.05             | p>0.05            |
| # cells            | 1975                                       | 2662               | 2495              |

| Fig 3I             | Microglial nodes                           |                    |                   |
|--------------------|--------------------------------------------|--------------------|-------------------|
|                    | Control                                    | Ket/xyl            | Thiopental        |
| Values             | 7.435                                      | 6.093              | 7.885             |
|                    | 8.694                                      | 6.909              | 8.117             |
|                    | 8.439                                      | 7.23               | 8.077             |
|                    | 7.395                                      | 6.679              | 6.779             |
|                    | 7.698                                      | 6.425              | 8.55              |
|                    |                                            | 7.877              | 8.399             |
| Mean               | <b>7.9322</b>                              | <b>6.868833333</b> | <b>7.96783333</b> |
| SD                 | <b>0.597458534</b>                         | <b>0.62982487</b>  | <b>0.62915449</b> |
| Statistical method | Kruskall Wallis test and Dunn's correction |                    |                   |
| p-value            |                                            | p>0.05             | p>0.05            |
| # cells            | 1975                                       | 2662               | 2495              |

| Fig 4A             | Microglial cytoplasm                       |                    |                   |
|--------------------|--------------------------------------------|--------------------|-------------------|
|                    | Control                                    | Ket/xyl            | Thiopental        |
| Values             | 60.4                                       | 55.86              | 54.86             |
|                    | 67.24                                      | 60.76              | 61.5              |
|                    | 81.4                                       | 59.72              | 59.88             |
|                    | 62.76                                      | 62.3               | 52.72             |
|                    | 69.48                                      | 57.88              | 57.62             |
|                    |                                            | 69                 | 64.72             |
| Mean               | <b>68.256</b>                              | <b>60.92</b>       | <b>58.55</b>      |
| SD                 | <b>8.173400761</b>                         | <b>4.549760433</b> | <b>4.40477468</b> |
| Statistical method | Kruskall Wallis test and Dunn's correction |                    |                   |
| p-value            |                                            | p>0.05             | p<0.05            |
| # cells            | 1713                                       | 1808               | 2173              |

| Fig 4B             | Microglial complexity                      |                    |                   |
|--------------------|--------------------------------------------|--------------------|-------------------|
|                    | Control                                    | Ket/xyl            | Thiopental        |
| Values             | 3.328                                      | 3.182              | 3.389             |
|                    | 3.691                                      | 3.444              | 3.623             |
|                    | 3.831                                      | 3.191              | 3.784             |
|                    | 3.43                                       | 3.157              | 3.581             |
|                    | 3.802                                      | 3.29               | 3.477             |
|                    |                                            | 3.563              | 3.787             |
| Mean               | <b>3.6164</b>                              | <b>3.3045</b>      | <b>3.60683333</b> |
| SD                 | <b>0.225823604</b>                         | <b>0.165007576</b> | <b>0.16067659</b> |
| Statistical method | Kruskall Wallis test and Dunn's correction |                    |                   |
| p-value            |                                            | p<0.05             | p>0.05            |
| # cells            | 1713                                       | 1808               | 2173              |

| Fig 4C             | Microglial cell environment                |                    |                   |
|--------------------|--------------------------------------------|--------------------|-------------------|
|                    | Control                                    | Ket/xyl            | Thiopental        |
| Values             | 188.6                                      | 171.7              | 125.1             |
|                    | 237.4                                      | 186.5              | 220.6             |
|                    | 226.8                                      | 192                | 273.2             |
|                    | 195                                        | 179.1              | 186.1             |
|                    | 224                                        | 200                | 243.2             |
|                    |                                            | 186.5              | 289.7             |
| Mean               | <b>214.36</b>                              | <b>185.9666667</b> | <b>222.983333</b> |
| SD                 | <b>21.31262537</b>                         | <b>9.844727861</b> | <b>60.5454347</b> |
| Statistical method | Kruskall Wallis test and Dunn's correction |                    |                   |
| p-value            |                                            | p>0.05             | p>0.05            |
| # cells            | 1713                                       | 1808               | 2173              |

| Fig 4D             | Segments by cell                           |                    |                   |
|--------------------|--------------------------------------------|--------------------|-------------------|
|                    | Control                                    | Ket/xyl            | Thiopental        |
| Values             | 10.09                                      | 10.17              | 10.34             |
|                    | 12.44                                      | 10.35              | 12.2              |
|                    | 13.61                                      | 10.8               | 12.33             |
|                    | 11.18                                      | 10.34              | 11.21             |
|                    | 12.41                                      | 10.59              | 11.75             |
|                    |                                            | 11.75              | 13.12             |
| Mean               | <b>11.946</b>                              | <b>10.66666667</b> | <b>11.825</b>     |
| SD                 | <b>1.347193379</b>                         | <b>0.574618714</b> | <b>0.96558273</b> |
| Statistical method | Kruskall Wallis test and Dunn's correction |                    |                   |
| p-value            |                                            | p>0.05             | p>0.05            |
| # cells            | 1713                                       | 1808               | 2173              |

| Fig 4E             | Microglial ramification length             |                    |                   |
|--------------------|--------------------------------------------|--------------------|-------------------|
|                    | Control                                    | Ket/xyl            | Thiopental        |
| Values             | 314.7                                      | 307.2              | 327               |
|                    | 385.8                                      | 315.7              | 378.5             |
|                    | 416.4                                      | 331.3              | 381.6             |
|                    | 345.6                                      | 323.4              | 353.8             |
|                    | 383.6                                      | 332.3              | 357.7             |
|                    |                                            | 353.8              | 412.4             |
| Mean               | <b>369.22</b>                              | <b>327.2833333</b> | <b>368.5</b>      |
| SD                 | <b>39.4904039</b>                          | <b>16.10607546</b> | <b>29.1677905</b> |
| Statistical method | Kruskall Wallis test and Dunn's correction |                    |                   |
| p-value            |                                            | p>0.05             | p>0.05            |
| # cells            | 1713                                       | 1808               | 2173              |

| Fig 4F             | Microglial nodes                           |                    |                   |
|--------------------|--------------------------------------------|--------------------|-------------------|
|                    | Control                                    | Ket/xyl            | Thiopental        |
| Values             | 7.378                                      | 6.94               | 7.028             |
|                    | 8.329001                                   | 7.117              | 8.767             |
|                    | 10.07                                      | 7.314              | 8.804             |
|                    | 7.72                                       | 7.004              | 7.909             |
|                    | 8.989                                      | 7.314              | 8.302             |
|                    |                                            | 8.344              | 9.523             |
| Mean               | <b>8.4972002</b>                           | <b>7.338833333</b> | <b>8.38883333</b> |
| SD                 | <b>1.072439563</b>                         | <b>0.516136578</b> | <b>0.85922696</b> |
| Statistical method | Kruskall Wallis test and Dunn's correction |                    |                   |
| p-value            |                                            | p>0.05             | p>0.05            |
| # cells            | 1713                                       | 1808               | 2173              |
